# Supplementary material
Source: PubMed Central journal article supplement (PMC4442533)
Supplement: JVI.03717-14_zjv999090363so1.pdf [file JVI.03717-14_zjv999090363so1.pdf]

1 **Figure S1. Heatmap analysis of immune epitopes.** Viral diversity within experimentally defined  
 2 CD8+ T cell epitopes. Heat-maps illustrate variant codon frequencies over time within ELISpot  
 3 confirmed CD8+ T cell epitopes for subjects Ch\_23, Ch\_240 and CI\_360. The baseline sequence  
 4 represents the T/F sequence. Columns represent epitope position and rows illustrate the diversity  
 5 present overtime, as defined by days post-infection (DPI). The colored legend illustrates the  
 6 frequency of occurrence, as a percentage, that the variant residue reached within the viral  
 7 population at a given timepoint.

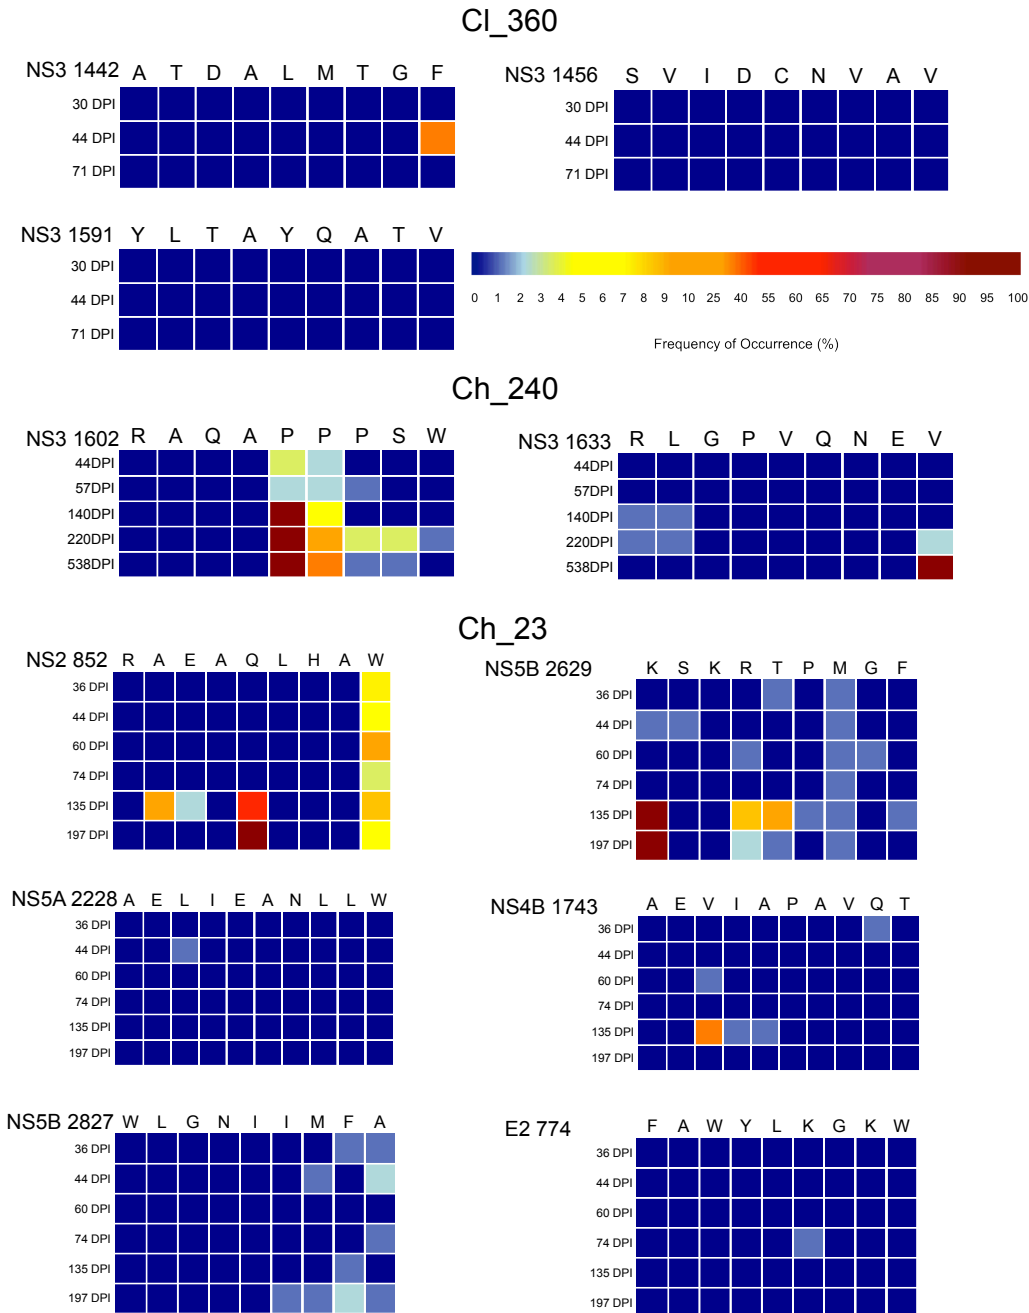

**Table S1** Detailed summary of the next-generation deep sequencing data.

| Subject ID | Days Post Infection | No. of Reads (Raw count) | Percentage of Reads Aligned | Avg Coverage per Position | SD of Coverage per Position | Max Coverage per Position |
|------------|---------------------|--------------------------|-----------------------------|---------------------------|-----------------------------|---------------------------|
| Ch_23      | 36                  | 94294                    | 99.73                       | 3840.40                   | 2333.50                     | 13866                     |
|            | 44                  | 64558                    | 100.00                      | 2594.56                   | 2010.92                     | 10509                     |
|            | 60                  | 56688                    | 98.99                       | 2327.96                   | 1868.96                     | 7927                      |
|            | 74                  | 91396                    | 97.44                       | 3814.34                   | 1975.69                     | 11036                     |
|            | 135                 | 99506                    | 98.99                       | 4328.23                   | 1936.35                     | 8067                      |
|            | 197                 | 151987                   | 65.16                       | 3167.26                   | 2749.88                     | 12778                     |
| Ch_240     | 44                  | 94304                    | 99.66                       | 4037.42                   | 2614.05                     | 11146                     |
|            | 57                  | 88927                    | 100.00                      | 3392.34                   | 2411.32                     | 8611                      |
|            | 140 <sup>a</sup>    | 24624                    | 98.97                       | 5382.50                   | 370.08                      | 6023                      |
|            | 220                 | 164747                   | 99.29                       | 7055.43                   | 3020.31                     | 17228                     |
|            | 538                 | 102343                   | 99.88                       | 3813.00                   | 2711.00                     | 10114                     |
| CI_360     | 30                  | 116371                   | 98.36                       | 4217.53                   | 1765.93                     | 10939                     |
|            | 44                  | 68050                    | 97.57                       | 2494.40                   | 2352.02                     | 9021                      |
|            | 71                  | 95819                    | 98.71                       | 4558.44                   | 1555.72                     | 11276                     |

<sup>a</sup> This data set covers only the NS3 region of the HCV genome.

**Table S2.** Statistical analysis for testing the presence of positive and negative selections on HCV viral populations. Red box represents evidence of positive/diversifying selection, while green box represent evidence of negative purifying selection. The dN/dS values were classified as 'Undefined' (dN = 0, dS = 0), or Infinite if dN or dS were equal to zero.

**Sub Ch\_23**

**Epitope  
FAWYLKGKW**

| Starting NT | Codon | Epitope | FEL       |         | MEME    |         | ECS     |         |
|-------------|-------|---------|-----------|---------|---------|---------|---------|---------|
|             |       |         | dN/dS     | p-value | p-value | q-value | p-value | q-value |
| 2491        | 764   |         | Undefined | 1.000   | 1.000   | 1.000   | 1.000   | 1.000   |
| 2494        | 765   |         | Undefined | 1.000   | 1.000   | 1.000   | 1.000   | 1.000   |
| 2497        | 766   |         | Undefined | 1.000   | 1.000   | 1.000   | 1.000   | 1.000   |
| 2500        | 767   |         | Undefined | 1.000   | 1.000   | 1.000   | 1.000   | 1.000   |
| 2503        | 768   |         | Undefined | 1.000   | 1.000   | 1.000   | 1.000   | 1.000   |
| 2506        | 769   |         | Undefined | 1.000   | 1.000   | 1.000   | 1.000   | 1.000   |
| 2509        | 770   |         | Undefined | 1.000   | 1.000   | 1.000   | 1.000   | 1.000   |
| 2512        | 771   |         | Undefined | 1.000   | 1.000   | 1.000   | 1.000   | 1.000   |
| 2515        | 772   |         | Undefined | 1.000   | 1.000   | 1.000   | 1.000   | 1.000   |
| 2518        | 773   |         | Undefined | 1.000   | 1.000   | 1.000   | 1.000   | 1.000   |
| 2521        | 774   | F       | Undefined | 1.000   | 1.000   | 1.000   | 1.000   | 1.000   |
| 2524        | 775   | A       | Undefined | 1.000   | 1.000   | 1.000   | 1.000   | 1.000   |
| 2527        | 776   | W       | Undefined | 1.000   | 1.000   | 1.000   | 1.000   | 1.000   |
| 2530        | 777   | Y       | Undefined | 1.000   | 1.000   | 1.000   | 1.000   | 1.000   |
| 2533        | 778   | L       | Undefined | 1.000   | 1.000   | 1.000   | 1.000   | 1.000   |
| 2536        | 779   | K       | Undefined | 1.000   | 1.000   | 1.000   | 1.000   | 1.000   |
| 2539        | 780   | G       | Undefined | 1.000   | 1.000   | 1.000   | 1.000   | 1.000   |
| 2542        | 781   | K       | Undefined | 1.000   | 1.000   | 1.000   | 1.000   | 1.000   |
| 2545        | 782   | W       | Undefined | 1.000   | 1.000   | 1.000   | 1.000   | 1.000   |
| 2548        | 783   |         | Undefined | 1.000   | 1.000   | 1.000   | 1.000   | 1.000   |
| 2551        | 784   |         | Undefined | 1.000   | 1.000   | 1.000   | 1.000   | 1.000   |

**RAEAQLHAW**

| Starting NT | Codon | Epitope | FEL         |         | MEME    |         | ECS     |         |
|-------------|-------|---------|-------------|---------|---------|---------|---------|---------|
|             |       |         | dN/dS       | p-value | p-value | q-value | p-value | q-value |
| 2725        | 842   |         | Undefined   | 1.000   | 1.000   | 1.000   | 1.000   | 1.000   |
| 2728        | 843   |         | Undefined   | 1.000   | 1.000   | 1.000   | 1.000   | 1.000   |
| 2731        | 844   |         | Undefined   | 1.000   | 1.000   | 1.000   | 1.000   | 1.000   |
| 2734        | 845   |         | Undefined   | 1.000   | 1.000   | 1.000   | 1.000   | 1.000   |
| 2737        | 846   |         | Undefined   | 1.000   | 1.000   | 1.000   | 1.000   | 1.000   |
| 2740        | 847   |         | Undefined   | 1.000   | 1.000   | 1.000   | 1.000   | 1.000   |
| 2743        | 848   |         | Undefined   | 1.000   | 1.000   | 1.000   | 1.000   | 1.000   |
| 2746        | 849   |         | Undefined   | 1.000   | 1.000   | 1.000   | 1.000   | 1.000   |
| 2749        | 850   |         | Undefined   | 1.000   | 1.000   | 1.000   | 1.000   | 1.000   |
| 2752        | 851   |         | Undefined   | 1.000   | 1.000   | 1.000   | 1.000   | 1.000   |
| 2755        | 852   | R       | 0           | 0.022   | 0.670   | 1.000   | 1.000   | 1.000   |
| 2758        | 853   | A       | Undefined   | 1.000   | 1.000   | 1.000   | 1.000   | 1.000   |
| 2761        | 854   | E       | Undefined   | 1.000   | 1.000   | 1.000   | 1.000   | 1.000   |
| 2764        | 855   | A       | Undefined   | 1.000   | 1.000   | 1.000   | 1.000   | 1.000   |
| 2767        | 856   | Q       | 7.46311E+14 | 0.095   | 0.037   | 1.000   | 0.070   | 0.300   |
| 2770        | 857   | L       | Undefined   | 1.000   | 1.000   | 1.000   | 0.070   | 0.050   |
| 2773        | 858   | H       | Undefined   | 1.000   | 1.000   | 1.000   | 0.070   | 0.050   |
| 2776        | 859   | A       | Undefined   | 1.000   | 1.000   | 1.000   | 0.070   | 0.050   |
| 2779        | 860   | W       | 2.17335E+13 | 0.761   | 0.561   | 1.000   | 0.070   | 0.050   |
| 2782        | 861   |         | 5492320     | 0.102   | 0.160   | 1.000   | 0.003   | 0.050   |
| 2785        | 862   |         | Infinite    | 0.277   | 0.287   | 1.000   | 0.000   | 0.050   |
| 2788        | 863   |         | Undefined   | 1.000   | 1.000   | 1.000   | 0.003   | 0.050   |
| 2791        | 864   |         | 0.557       | 0.731   | 0.003   | 0.349   | 0.000   | 0.050   |
| 2794        | 865   |         | Undefined   | 1.000   | 1.000   | 1.000   | 1.000   | 1.000   |
| 2797        | 866   |         | 0.528       | 0.656   | 0.670   | 1.000   | 1.000   | 1.000   |
| 2800        | 867   |         | Infinite    | 0.367   | 0.344   | 1.000   | 1.000   | 1.000   |
| 2803        | 868   |         | Undefined   | 1.000   | 1.000   | 1.000   | 1.000   | 1.000   |
| 2806        | 869   |         | 0.912       | 0.941   | 0.395   | 1.000   | 1.000   | 1.000   |

2809                      870                                              Infinite                      0.253                      0.298                      1.000                      1.000                      1.000

**AEVIAPAVQT**

| Starting NT | Codon | Epitope | FEL<br>dN/dS | p-value | MEME<br>p-value | q-value | ECS<br>p-value | q-value |
|-------------|-------|---------|--------------|---------|-----------------|---------|----------------|---------|
| 5398        | 1733  |         | Undefined    | 1.000   | 1.000           | 1.000   | 0.990          | 0.990   |
| 5401        | 1734  |         | Undefined    | 1.000   | 1.000           | 1.000   | 0.990          | 0.990   |
| 5404        | 1735  |         | Undefined    | 1.000   | 1.000           | 1.000   | 0.990          | 0.990   |
| 5407        | 1736  |         | Undefined    | 1.000   | 1.000           | 1.000   | 0.990          | 0.990   |
| 5410        | 1737  |         | Undefined    | 1.000   | 1.000           | 1.000   | 0.990          | 0.990   |
| 5413        | 1738  |         | 0            | 0.111   | 0.670           | 1.000   | 0.990          | 0.990   |
| 5416        | 1739  |         | Undefined    | 1.000   | 1.000           | 1.000   | 0.990          | 0.990   |
| 5419        | 1740  |         | Undefined    | 1.000   | 1.000           | 1.000   | 0.990          | 0.990   |
| 5422        | 1741  |         | Undefined    | 1.000   | 1.000           | 1.000   | 0.990          | 0.990   |
| 5425        | 1742  |         | Undefined    | 1.000   | 1.000           | 1.000   | 0.990          | 0.990   |
| 5428        | 1743  | A       | Undefined    | 1.000   | 1.000           | 1.000   | 0.990          | 0.990   |
| 5431        | 1744  | E       | Undefined    | 1.000   | 1.000           | 1.000   | 0.990          | 0.990   |
| 5434        | 1745  | V       | Infinite     | 0.444   | 0.409           | 1.000   | 0.100          | 0.780   |
| 5437        | 1746  | I       | Undefined    | 1.000   | 0.670           | 1.000   | 0.060          | 0.640   |
| 5440        | 1747  | A       | Infinite     | 0.269   | 0.000           | 0.042   | 0.060          | 0.640   |
| 5443        | 1748  | P       | Undefined    | 1.000   | 1.000           | 1.000   | 0.100          | 0.600   |
| 5446        | 1749  | A       | Undefined    | 1.000   | 1.000           | 1.000   | 0.100          | 0.640   |
| 5449        | 1750  | V       | Undefined    | 1.000   | 1.000           | 1.000   | 0.100          | 0.640   |
| 5452        | 1751  | Q       | Undefined    | 1.000   | 1.000           | 1.000   | 0.100          | 0.640   |
| 5455        | 1752  | T       | Undefined    | 1.000   | 1.000           | 1.000   | 0.100          | 0.990   |
| 5458        | 1753  |         | Undefined    | 1.000   | 1.000           | 1.000   | 0.100          | 0.990   |
| 5461        | 1754  |         | Undefined    | 1.000   | 1.000           | 1.000   | 0.100          | 0.990   |
| 5464        | 1755  |         | 0            | 0.140   | 0.670           | 1.000   | 0.100          | 0.990   |
| 5467        | 1756  |         | 0            | 0.097   | 0.670           | 1.000   | 0.100          | 0.990   |
| 5470        | 1757  |         | 0            | 0.160   | 0.670           | 1.000   | 0.100          | 0.990   |
| 5473        | 1758  |         | Undefined    | 1.000   | 1.000           | 1.000   | 0.100          | 0.990   |

|      |      |           |       |       |       |       |       |
|------|------|-----------|-------|-------|-------|-------|-------|
| 5476 | 1759 | Undefined | 1.000 | 1.000 | 1.000 | 0.100 | 0.990 |
| 5479 | 1760 | 0         | 0.098 | 0.670 | 1.000 | 0.100 | 0.990 |
| 5482 | 1761 | Undefined | 1.000 | 1.000 | 1.000 | 0.990 | 0.990 |
| 5485 | 1762 | Undefined | 1.000 | 1.000 | 1.000 | 0.990 | 0.990 |

### AELIEANLLW

| Starting NT | Codon | Epitope | FEL<br>dN/dS | p-value | MEME<br>p-value | q-value | ECS<br>p-value | q-value |
|-------------|-------|---------|--------------|---------|-----------------|---------|----------------|---------|
| 6841        | 2214  |         | Undefined    | 1.000   | 1.000           | 1.000   | 0.990          | 0.990   |
| 6844        | 2215  |         | Undefined    | 1.000   | 1.000           | 1.000   | 0.990          | 0.990   |
| 6847        | 2216  |         | Undefined    | 1.000   | 1.000           | 1.000   | 0.990          | 0.990   |
| 6850        | 2217  |         | 0            | 1.000   | 0.670           | 1.000   | 0.990          | 0.990   |
| 6853        | 2218  |         | Undefined    | 1.000   | 1.000           | 1.000   | 0.990          | 0.990   |
| 6856        | 2219  |         | Undefined    | 1.000   | 1.000           | 1.000   | 0.990          | 0.990   |
| 6859        | 2220  |         | Undefined    | 1.000   | 1.000           | 1.000   | 0.990          | 0.990   |
| 6862        | 2221  |         | Undefined    | 1.000   | 1.000           | 1.000   | 0.990          | 0.990   |
| 6865        | 2222  |         | Undefined    | 1.000   | 1.000           | 1.000   | 0.990          | 0.990   |
| 6868        | 2223  |         | Undefined    | 1.000   | 1.000           | 1.000   | 0.990          | 0.990   |
| 6871        | 2224  | A       | Undefined    | 1.000   | 1.000           | 1.000   | 0.990          | 0.990   |
| 6874        | 2225  | E       | Undefined    | 1.000   | 1.000           | 1.000   | 0.990          | 0.990   |
| 6877        | 2226  | L       | Undefined    | 1.000   | 1.000           | 1.000   | 0.990          | 0.990   |
| 6880        | 2227  | I       | Undefined    | 1.000   | 1.000           | 1.000   | 0.990          | 0.990   |
| 6883        | 2228  | E       | Undefined    | 1.000   | 1.000           | 1.000   | 0.990          | 0.990   |
| 6886        | 2229  | A       | Undefined    | 1.000   | 1.000           | 1.000   | 0.990          | 0.990   |
| 6889        | 2230  | N       | Undefined    | 1.000   | 1.000           | 1.000   | 0.990          | 0.990   |
| 6892        | 2231  | L       | Undefined    | 1.000   | 1.000           | 1.000   | 0.990          | 0.990   |
| 6895        | 2232  | L       | Undefined    | 1.000   | 1.000           | 1.000   | 0.990          | 0.990   |
| 6898        | 2233  | W       | Undefined    | 1.000   | 1.000           | 1.000   | 0.990          | 0.990   |
| 6901        | 2234  |         | Undefined    | 1.000   | 1.000           | 1.000   | 0.990          | 0.990   |
| 6904        | 2235  |         | Undefined    | 1.000   | 1.000           | 1.000   | 0.100          | 0.670   |
| 6907        | 2236  |         | 9.79579E+14  | 0.353   | 0.346           | 1.000   | 0.100          | 0.670   |
| 6910        | 2237  |         | Undefined    | 1.000   | 1.000           | 1.000   | 0.100          | 0.670   |

|      |      |           |       |       |       |       |       |
|------|------|-----------|-------|-------|-------|-------|-------|
| 6913 | 2238 | Undefined | 1.000 | 1.000 | 1.000 | 0.580 | 0.990 |
| 6916 | 2239 | Undefined | 1.000 | 1.000 | 1.000 | 0.580 | 0.990 |
| 6919 | 2240 | Undefined | 1.000 | 1.000 | 1.000 | 0.580 | 0.990 |
| 6922 | 2241 | 0         | 0.000 | 0.670 | 1.000 | 0.580 | 0.990 |
| 6925 | 2242 | Undefined | 1.000 | 1.000 | 1.000 | 0.580 | 0.990 |
| 6928 | 2243 | Undefined | 1.000 | 1.000 | 1.000 | 0.580 | 0.990 |

### KSKRTPMGF

| Starting NT | Codon | Epitope | FEL         |         | MEME    |         | ECS     |         |
|-------------|-------|---------|-------------|---------|---------|---------|---------|---------|
|             |       |         | dN/dS       | p-value | p-value | q-value | p-value | q-value |
| 8056        | 2619  |         | Undefined   | 1.000   | 1.000   | 1.000   | 0.990   | 0.990   |
| 8059        | 2620  |         | Undefined   | 1.000   | 1.000   | 1.000   | 0.990   | 0.990   |
| 8062        | 2621  |         | Undefined   | 1.000   | 1.000   | 1.000   | 0.990   | 0.990   |
| 8065        | 2622  |         | Undefined   | 1.000   | 1.000   | 1.000   | 0.600   | 0.500   |
| 8068        | 2623  |         | Undefined   | 1.000   | 1.000   | 1.000   | 0.300   | 0.500   |
| 8071        | 2624  |         | Undefined   | 1.000   | 1.000   | 1.000   | 0.070   | 0.500   |
| 8074        | 2625  |         | Undefined   | 1.000   | 1.000   | 1.000   | 0.070   | 0.100   |
| 8077        | 2626  |         | Undefined   | 1.000   | 1.000   | 1.000   | 0.000   | 0.002   |
| 8080        | 2627  |         | 0           | 0.133   | 0.670   | 1.000   | 0.000   | 0.002   |
| 8083        | 2628  |         | Undefined   | 1.000   | 1.000   | 1.000   | 0.000   | 0.002   |
| 8086        | 2629  | K       | 1.2217E+14  | 0.564   | 0.395   | 1.000   | 0.000   | 0.002   |
| 8089        | 2630  | S       | 1214709.622 | 0.406   | 0.386   | 1.000   | 0.000   | 0.002   |
| 8092        | 2631  | K       | Undefined   | 1.000   | 1.000   | 1.000   | 0.000   | 0.002   |
| 8095        | 2632  | R       | 2.09699E+14 | 0.385   | 0.360   | 1.000   | 0.000   | 0.002   |
| 8098        | 2633  | T       | 4.43898E+14 | 0.146   | 0.051   | 1.000   | 0.000   | 0.002   |
| 8101        | 2634  | P       | Undefined   | 1.000   | 1.000   | 1.000   | 0.000   | 0.003   |
| 8104        | 2635  | M       | Undefined   | 1.000   | 1.000   | 1.000   | 0.000   | 0.000   |
| 8107        | 2636  | G       | Undefined   | 1.000   | 1.000   | 1.000   | 0.010   | 0.010   |
| 8110        | 2637  | F       | Undefined   | 1.000   | 1.000   | 1.000   | 0.010   | 0.060   |
| 8113        | 2638  |         | Undefined   | 1.000   | 1.000   | 1.000   | 0.010   | 0.060   |
| 8116        | 2639  |         | Undefined   | 1.000   | 1.000   | 1.000   | 0.100   | 0.800   |

|      |      |           |       |       |       |       |       |
|------|------|-----------|-------|-------|-------|-------|-------|
| 8119 | 2640 | Undefined | 1.000 | 1.000 | 1.000 | 0.200 | 0.800 |
| 8122 | 2641 | Undefined | 1.000 | 1.000 | 1.000 | 0.990 | 0.990 |
| 8125 | 2642 | Undefined | 1.000 | 1.000 | 1.000 | 0.990 | 0.990 |
| 8128 | 2643 | Undefined | 1.000 | 1.000 | 1.000 | 0.990 | 0.990 |
| 8131 | 2644 | Undefined | 1.000 | 1.000 | 1.000 | 0.990 | 0.990 |
| 8134 | 2645 | Undefined | 1.000 | 1.000 | 1.000 | 0.990 | 0.990 |
| 8137 | 2646 | Undefined | 1.000 | 1.000 | 1.000 | 0.990 | 0.990 |

### WLGNIIMFA

| Starting NT | Codon | Epitope | FEL<br>dN/dS | p-value | MEME<br>p-value | q-value | ECS<br>p-value | q-value |
|-------------|-------|---------|--------------|---------|-----------------|---------|----------------|---------|
| 8653        | 2818  |         | Undefined    | 1.000   | 1.000           | 1.000   | 1.000          | 0.990   |
| 8656        | 2819  |         | Undefined    | 1.000   | 1.000           | 1.000   | 1.000          | 0.990   |
| 8659        | 2820  |         | Undefined    | 1.000   | 1.000           | 1.000   | 1.000          | 0.990   |
| 8662        | 2821  |         | Undefined    | 1.000   | 1.000           | 1.000   | 1.000          | 0.990   |
| 8665        | 2822  |         | Undefined    | 1.000   | 1.000           | 1.000   | 1.000          | 0.990   |
| 8668        | 2823  |         | Undefined    | 1.000   | 1.000           | 1.000   | 1.000          | 0.990   |
| 8671        | 2824  |         | Undefined    | 1.000   | 1.000           | 1.000   | 1.000          | 0.990   |
| 8674        | 2825  |         | Undefined    | 1.000   | 1.000           | 1.000   | 1.000          | 0.990   |
| 8677        | 2826  |         | Undefined    | 1.000   | 1.000           | 1.000   | 1.000          | 0.990   |
| 8680        | 2827  |         | Undefined    | 1.000   | 1.000           | 1.000   | 1.000          | 0.990   |
| 8683        | 2828  | W       | Undefined    | 1.000   | 1.000           | 1.000   | 1.000          | 0.990   |
| 8686        | 2829  | L       | Undefined    | 1.000   | 1.000           | 1.000   | 1.000          | 0.990   |
| 8689        | 2830  | G       | Undefined    | 1.000   | 1.000           | 1.000   | 1.000          | 0.990   |
| 8692        | 2831  | N       | Undefined    | 1.000   | 1.000           | 1.000   | 1.000          | 0.990   |
| 8695        | 2832  | I       | Undefined    | 1.000   | 1.000           | 1.000   | 1.000          | 0.990   |
| 8698        | 2833  | I       | Undefined    | 1.000   | 1.000           | 1.000   | 1.000          | 0.990   |
| 8701        | 2834  | M       | Undefined    | 1.000   | 1.000           | 1.000   | 1.000          | 0.990   |
| 8704        | 2835  | F       | Undefined    | 1.000   | 1.000           | 1.000   | 1.000          | 0.990   |
| 8707        | 2836  | A       | 1.23846E+15  | 0.233   | 0.004           | 0.920   | 0.200          | 0.800   |
| 8710        | 2837  |         | Undefined    | 1.000   | 1.000           | 1.000   | 1.000          | 0.990   |
| 8713        | 2838  |         | Undefined    | 1.000   | 1.000           | 1.000   | 1.000          | 0.990   |



|      |      |           |       |       |       |       |       |
|------|------|-----------|-------|-------|-------|-------|-------|
| 8716 | 2839 | Undefined | 1.000 | 1.000 | 1.000 | 1.000 | 0.990 |
| 8719 | 2840 | Undefined | 1.000 | 1.000 | 1.000 | 1.000 | 0.990 |
| 8722 | 2841 | Undefined | 1.000 | 1.000 | 1.000 | 1.000 | 0.990 |
| 8725 | 2842 | Undefined | 1.000 | 1.000 | 1.000 | 1.000 | 0.990 |
| 8728 | 2843 | Undefined | 1.000 | 1.000 | 1.000 | 1.000 | 0.990 |
| 8731 | 2844 | Undefined | 1.000 | 1.000 | 1.000 | 1.000 | 0.990 |
| 8734 | 2845 | Undefined | 1.000 | 1.000 | 1.000 | 1.000 | 0.990 |
| 8737 | 2846 | Undefined | 1.000 | 1.000 | 1.000 | 1.000 | 0.990 |

Sub Ch\_240

RAQAPPSW  
RLGPVQNEV

| Starting NT | Codon | Epitope | FEL         |         | MEME    |         | ECS     |         |
|-------------|-------|---------|-------------|---------|---------|---------|---------|---------|
|             |       |         | dN/dS       | p-value | p-value | q-value | p-value | q-value |
| 5030        | 1597  |         | Undefined   | 1.000   | 1.000   | 1.000   | 0.990   | 0.990   |
| 5033        | 1598  |         | Undefined   | 1.000   | 1.000   | 1.000   | 0.990   | 0.990   |
| 5036        | 1599  |         | Undefined   | 1.000   | 1.000   | 1.000   | 0.990   | 0.990   |
| 5039        | 1600  |         | Undefined   | 1.000   | 1.000   | 1.000   | 0.553   | 0.990   |
| 5042        | 1601  |         | Undefined   | 1.000   | 1.000   | 1.000   | 0.035   | 0.200   |
| 5045        | 1602  | R       | Undefined   | 1.000   | 1.000   | 1.000   | 0.017   | 0.100   |
| 5048        | 1603  | A       | Undefined   | 1.000   | 1.000   | 1.000   | 0.017   | 0.100   |
| 5051        | 1604  | Q       | Undefined   | 1.000   | 0.670   | 1.000   | 0.017   | 0.100   |
| 5054        | 1605  | A       | Undefined   | 1.000   | 1.000   | 1.000   | 0.017   | 0.100   |
| 5057        | 1606  | P       | 1.238       | 0.806   | 0.611   | 1.000   | 0.006   | 0.070   |
| 5060        | 1607  | P       | 9.11513E+14 | 0.231   | 0.244   | 1.000   | 0.017   | 0.070   |
| 5063        | 1608  | P       | Infinite    | 0.467   | 0.341   | 1.000   | 0.017   | 0.070   |
| 5066        | 1609  | S       | Infinite    | 0.362   | 0.446   | 1.000   | 0.017   | 0.070   |
| 5069        | 1610  | W       | Undefined   | 1.000   | 1.000   | 1.000   | 0.017   | 0.070   |
| 5072        | 1611  |         | Undefined   | 1.000   | 1.000   | 1.000   | 0.200   | 0.990   |
| 5075        | 1612  |         | Undefined   | 1.000   | 1.000   | 1.000   | 0.200   | 0.990   |
| 5078        | 1613  |         | Undefined   | 1.000   | 1.000   | 1.000   | 0.200   | 0.990   |
| 5081        | 1614  |         | Undefined   | 1.000   | 1.000   | 1.000   | 0.260   | 0.990   |
| 5084        | 1615  |         | Undefined   | 1.000   | 1.000   | 1.000   | 0.749   | 0.990   |
| 5087        | 1616  |         | Undefined   | 1.000   | 1.000   | 1.000   | 0.990   | 0.990   |
| 5090        | 1617  |         | Undefined   | 1.000   | 1.000   | 1.000   | 0.990   | 0.990   |
| 5093        | 1618  |         | Undefined   | 1.000   | 1.000   | 1.000   | 0.990   | 0.990   |
| 5096        | 1619  |         | Undefined   | 1.000   | 1.000   | 1.000   | 0.990   | 0.990   |
| 5099        | 1620  |         | 0           | 0.043   | 0.670   | 1.000   | 0.990   | 0.990   |
| 5102        | 1621  |         | Undefined   | 1.000   | 1.000   | 1.000   | 0.990   | 0.990   |
| 5105        | 1622  |         | Undefined   | 1.000   | 1.000   | 1.000   | 0.990   | 0.990   |
| 5108        | 1623  |         | Undefined   | 1.000   | 1.000   | 1.000   | 0.990   | 0.990   |
| 5111        | 1624  |         | Undefined   | 1.000   | 1.000   | 1.000   | 0.990   | 0.990   |

|      |      |   |             |       |       |       |       |       |
|------|------|---|-------------|-------|-------|-------|-------|-------|
| 5114 | 1625 |   | Undefined   | 1.000 | 1.000 | 1.000 | 0.990 | 0.990 |
| 5117 | 1626 |   | Undefined   | 1.000 | 1.000 | 1.000 | 0.990 | 0.990 |
| 5120 | 1627 |   | Undefined   | 1.000 | 1.000 | 1.000 | 0.990 | 0.990 |
| 5123 | 1628 |   | Undefined   | 1.000 | 1.000 | 1.000 | 0.990 | 0.990 |
| 5126 | 1629 |   | Undefined   | 1.000 | 1.000 | 1.000 | 0.990 | 0.990 |
| 5129 | 1630 |   | Undefined   | 1.000 | 1.000 | 1.000 | 0.990 | 0.990 |
| 5132 | 1631 |   | Undefined   | 1.000 | 1.000 | 1.000 | 0.990 | 0.990 |
| 5135 | 1632 |   | Undefined   | 1.000 | 1.000 | 1.000 | 0.990 | 0.990 |
| 5138 | 1633 | R | 0           | 0.139 | 0.670 | 1.000 | 0.990 | 0.990 |
| 5141 | 1634 | L | 7.12512E+14 | 0.365 | 0.001 | 0.248 | 0.010 | 0.070 |
| 5144 | 1635 | G | Undefined   | 1.000 | 1.000 | 1.000 | 0.550 | 0.990 |
| 5147 | 1636 | P | Undefined   | 1.000 | 1.000 | 1.000 | 0.990 | 0.990 |
| 5150 | 1637 | V | Undefined   | 1.000 | 1.000 | 1.000 | 0.990 | 0.990 |
| 5153 | 1638 | Q | Undefined   | 1.000 | 1.000 | 1.000 | 0.990 | 0.990 |
| 5156 | 1639 | N | Undefined   | 1.000 | 1.000 | 1.000 | 0.990 | 0.990 |
| 5159 | 1640 | E | Undefined   | 1.000 | 1.000 | 1.000 | 0.990 | 0.990 |
| 5162 | 1641 | V | Infinite    | 0.204 | 0.214 | 1.000 | 0.990 | 0.990 |
| 5165 | 1642 |   | Undefined   | 1.000 | 1.000 | 1.000 | 0.990 | 0.990 |
| 5168 | 1643 |   | Undefined   | 1.000 | 1.000 | 1.000 | 0.990 | 0.990 |
| 5171 | 1644 |   | Undefined   | 1.000 | 1.000 | 1.000 | 0.990 | 0.990 |
| 5174 | 1645 |   | Undefined   | 1.000 | 1.000 | 1.000 | 0.990 | 0.990 |
| 5177 | 1646 |   | Undefined   | 1.000 | 1.000 | 1.000 | 0.990 | 0.990 |
| 5180 | 1647 |   | Undefined   | 1.000 | 1.000 | 1.000 | 0.990 | 0.990 |
| 5183 | 1648 |   | Undefined   | 1.000 | 1.000 | 1.000 | 0.990 | 0.990 |
| 5186 | 1649 |   | Undefined   | 1.000 | 1.000 | 1.000 | 0.990 | 0.990 |
| 5189 | 1650 |   | Undefined   | 1.000 | 1.000 | 1.000 | 0.990 | 0.990 |
| 5192 | 1651 |   | Undefined   | 1.000 | 1.000 | 1.000 | 0.990 | 0.990 |

Sub CI\_360

ATDALMTGF  
SVIDCNVAV

| Starting NT | Codon | Epitope | FEL         |         | MEME    |         | ECS     |         |
|-------------|-------|---------|-------------|---------|---------|---------|---------|---------|
|             |       |         | dN/dS       | p-value | p-value | q-value | p-value | q-value |
| 4634        | 1433  |         | Undefined   | 1.000   | 1.000   | 1.000   | 1.000   | 1.000   |
| 4637        | 1434  |         | Undefined   | 1.000   | 1.000   | 1.000   | 0.594   | 1.000   |
| 4640        | 1435  |         | Undefined   | 1.000   | 1.000   | 1.000   | 0.594   | 1.000   |
| 4643        | 1436  |         | Undefined   | 1.000   | 1.000   | 1.000   | 0.594   | 1.000   |
| 4646        | 1437  |         | Undefined   | 1.000   | 1.000   | 1.000   | 0.594   | 1.000   |
| 4649        | 1438  |         | Undefined   | 1.000   | 1.000   | 1.000   | 0.594   | 1.000   |
| 4652        | 1439  |         | Undefined   | 1.000   | 1.000   | 1.000   | 0.594   | 1.000   |
| 4655        | 1440  |         | 0           | 0.110   | 0.670   | 1.000   | 0.594   | 1.000   |
| 4658        | 1441  |         | Undefined   | 1.000   | 1.000   | 1.000   | 0.594   | 1.000   |
| 4661        | 1442  | A       | Undefined   | 1.000   | 1.000   | 1.000   | 0.594   | 1.000   |
| 4664        | 1443  | T       | Undefined   | 1.000   | 1.000   | 1.000   | 0.594   | 1.000   |
| 4667        | 1444  | D       | Undefined   | 1.000   | 1.000   | 1.000   | 0.594   | 1.000   |
| 4670        | 1445  | A       | Undefined   | 1.000   | 1.000   | 1.000   | 0.594   | 1.000   |
| 4673        | 1446  | L       | Undefined   | 1.000   | 1.000   | 1.000   | 1.000   | 1.000   |
| 4676        | 1447  | M       | Undefined   | 1.000   | 1.000   | 1.000   | 1.000   | 1.000   |
| 4679        | 1448  | T       | Undefined   | 1.000   | 1.000   | 1.000   | 1.000   | 1.000   |
| 4682        | 1449  | G       | Undefined   | 1.000   | 1.000   | 1.000   | 1.000   | 1.000   |
| 4685        | 1450  | F       | Undefined   | 1.000   | 1.000   | 1.000   | 0.330   | 1.000   |
| 4688        | 1451  |         | 1.29602E+14 | 0.477   | 0.337   | 1.000   | 0.330   | 1.000   |
| 4691        | 1452  |         | Undefined   | 1.000   | 1.000   | 1.000   | 0.330   | 1.000   |
| 4694        | 1453  |         | Undefined   | 1.000   | 1.000   | 1.000   | 0.330   | 1.000   |
| 4697        | 1454  |         | Undefined   | 1.000   | 1.000   | 1.000   | 0.330   | 1.000   |
| 4700        | 1455  |         | Undefined   | 1.000   | 1.000   | 1.000   | 0.330   | 1.000   |
| 4703        | 1456  | S       | Undefined   | 1.000   | 1.000   | 1.000   | 0.330   | 1.000   |
| 4706        | 1457  | V       | Undefined   | 1.000   | 1.000   | 1.000   | 1.000   | 1.000   |
| 4709        | 1458  | I       | Undefined   | 1.000   | 1.000   | 1.000   | 1.000   | 1.000   |
| 4712        | 1459  | D       | Undefined   | 1.000   | 1.000   | 1.000   | 1.000   | 1.000   |

|      |      |   |           |       |       |       |       |       |
|------|------|---|-----------|-------|-------|-------|-------|-------|
| 4715 | 1460 | C | Undefined | 1.000 | 1.000 | 1.000 | 1.000 | 1.000 |
| 4718 | 1461 | N | Undefined | 1.000 | 1.000 | 1.000 | 1.000 | 1.000 |
| 4721 | 1462 | V | Undefined | 1.000 | 1.000 | 1.000 | 1.000 | 1.000 |
| 4724 | 1463 | A | Undefined | 1.000 | 1.000 | 1.000 | 1.000 | 1.000 |
| 4727 | 1464 | V | Undefined | 1.000 | 1.000 | 1.000 | 1.000 | 1.000 |
| 4730 | 1465 |   | Undefined | 1.000 | 1.000 | 1.000 | 1.000 | 1.000 |
| 4733 | 1466 |   | Undefined | 1.000 | 1.000 | 1.000 | 1.000 | 1.000 |
| 4736 | 1467 |   | Undefined | 1.000 | 1.000 | 1.000 | 1.000 | 1.000 |
| 4739 | 1468 |   | Undefined | 1.000 | 1.000 | 1.000 | 1.000 | 1.000 |
| 4742 | 1469 |   | Undefined | 1.000 | 1.000 | 1.000 | 1.000 | 1.000 |
| 4745 | 1470 |   | Undefined | 1.000 | 1.000 | 1.000 | 1.000 | 1.000 |
| 4748 | 1471 |   | Undefined | 1.000 | 1.000 | 1.000 | 1.000 | 1.000 |
| 4751 | 1472 |   | Undefined | 1.000 | 1.000 | 1.000 | 1.000 | 1.000 |
| 4754 | 1473 |   | Undefined | 1.000 | 1.000 | 1.000 | 1.000 | 1.000 |
| 4757 | 1474 |   | Undefined | 1.000 | 1.000 | 1.000 | 1.000 | 1.000 |

#### YLTAYQATV

| Starting NT | Codon | Epitope | FEL       |         | MEME    |         | ECS     |         |
|-------------|-------|---------|-----------|---------|---------|---------|---------|---------|
|             |       |         | dN/dS     | p-value | p-value | q-value | p-value | q-value |
| 5078        | 1581  |         | Undefined | 1.000   | 1.000   | 1.000   | 1.000   | 1.000   |
| 5081        | 1582  |         | Undefined | 1.000   | 1.000   | 1.000   | 1.000   | 1.000   |
| 5084        | 1583  |         | Undefined | 1.000   | 1.000   | 1.000   | 1.000   | 1.000   |
| 5087        | 1584  |         | Undefined | 1.000   | 1.000   | 1.000   | 1.000   | 1.000   |
| 5090        | 1585  |         | Undefined | 1.000   | 1.000   | 1.000   | 1.000   | 1.000   |
| 5093        | 1586  |         | Undefined | 1.000   | 1.000   | 1.000   | 1.000   | 1.000   |
| 5096        | 1587  |         | Undefined | 1.000   | 1.000   | 1.000   | 1.000   | 1.000   |
| 5099        | 1588  |         | Undefined | 1.000   | 1.000   | 1.000   | 1.000   | 1.000   |
| 5102        | 1589  |         | Undefined | 1.000   | 1.000   | 1.000   | 1.000   | 1.000   |
| 5105        | 1590  |         | Undefined | 1.000   | 1.000   | 1.000   | 1.000   | 1.000   |
| 5108        | 1591  | Y       | Undefined | 1.000   | 1.000   | 1.000   | 1.000   | 1.000   |
| 5111        | 1592  | L       | Undefined | 1.000   | 1.000   | 1.000   | 1.000   | 1.000   |
| 5114        | 1593  | T       | Undefined | 1.000   | 1.000   | 1.000   | 1.000   | 1.000   |

|      |      |   |           |       |       |       |       |       |
|------|------|---|-----------|-------|-------|-------|-------|-------|
| 5117 | 1594 | A | Undefined | 1.000 | 1.000 | 1.000 | 1.000 | 1.000 |
| 5120 | 1595 | Y | Undefined | 1.000 | 1.000 | 1.000 | 1.000 | 1.000 |
| 5123 | 1596 | Q | Undefined | 1.000 | 1.000 | 1.000 | 1.000 | 1.000 |
| 5126 | 1597 | A | Undefined | 1.000 | 1.000 | 1.000 | 1.000 | 1.000 |
| 5129 | 1598 | T | Undefined | 1.000 | 1.000 | 1.000 | 1.000 | 1.000 |
| 5132 | 1599 | V | Undefined | 1.000 | 1.000 | 1.000 | 1.000 | 1.000 |
| 5135 | 1600 |   | Undefined | 1.000 | 1.000 | 1.000 | 1.000 | 1.000 |
| 5138 | 1601 |   | Undefined | 1.000 | 1.000 | 1.000 | 1.000 | 1.000 |
| 5141 | 1602 |   | Undefined | 1.000 | 1.000 | 1.000 | 1.000 | 1.000 |
| 5144 | 1603 |   | Undefined | 1.000 | 1.000 | 1.000 | 1.000 | 1.000 |
| 5147 | 1604 |   | Undefined | 1.000 | 1.000 | 1.000 | 1.000 | 1.000 |
| 5150 | 1605 |   | Undefined | 1.000 | 1.000 | 1.000 | 1.000 | 1.000 |
| 5153 | 1606 |   | Undefined | 1.000 | 0.670 | 1.000 | 1.000 | 1.000 |
| 5156 | 1607 |   | Undefined | 1.000 | 1.000 | 1.000 | 1.000 | 1.000 |
| 5159 | 1608 |   | Undefined | 1.000 | 1.000 | 1.000 | 1.000 | 1.000 |
| 5162 | 1609 |   | Undefined | 1.000 | 1.000 | 1.000 | 1.000 | 1.000 |
